# Supplementary material
Source: MDPI journal article supplement (https://www.mdpi.com/2079-6439/11/10/86)
Supplement: s1 [file s1]

Supplementary Materials

# Optimization of the Alkali-Silane Treatment of *Agave lechuguilla* Fibers (Ixtle) for Potential Reinforcement in Polymeric Composites

Noemi Jardon-Maximino <sup>1</sup>, Mariamne Dehonor Gómez <sup>2</sup>, Rolando Villa Moreno <sup>2</sup>, M. Dolores Baeza Alvarado <sup>2</sup>, and Luis E. Lugo Uribe <sup>2,\*</sup>

<sup>1</sup> CONAHCYT - CIATEQ, A.C. Centro de Tecnología Avanzada, Lerma, Estado de México 52004, México; [noemi.jardon@ciateq.mx](mailto:noemi.jardon@ciateq.mx)

<sup>2</sup> CIATEQ, A.C. Centro de Tecnología Avanzada, Lerma, Estado de México 52004, México; [mariamne.dehonor@ciateq.mx](mailto:mariamne.dehonor@ciateq.mx); [rolando.vmoreno@ciateq.mx](mailto:rolando.vmoreno@ciateq.mx); [maria.baeza@ciateq.mx](mailto:maria.baeza@ciateq.mx); [luis.lugo@ciateq.mx](mailto:luis.lugo@ciateq.mx)

\* Correspondence: [luis.lugo@ciateq.mx](mailto:luis.lugo@ciateq.mx)

Figure S1 presents representative images of the fiber diameter measurement method from images acquired with a stereomicroscope microscope. For each fiber, 3 measurements were performed to estimate the average value that was used for the stress calculation during the tensile strength test performed by DMA.

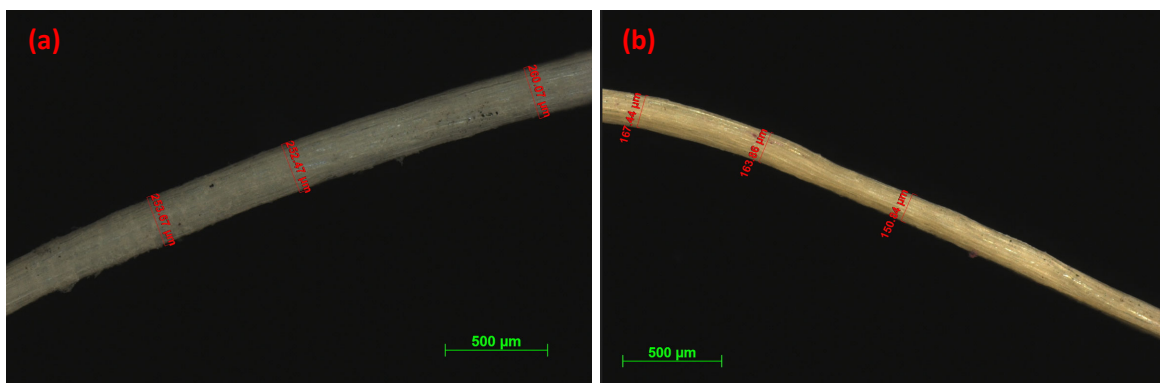

Figure S1. Optical microscope image of ixtle fibers at a magnification of 50x (a) untreated and (b) alkaline treated (Flx-5)

Table S1 presents the FTIR signal assignments for the Flx modified by alkaline treatment. Table S2 presents the FTIR signal assignment for the AcSi functionalized Flx.

Table S1 FTIR signal assignment for alkaline treated Flx

| Wavenumber (cm <sup>-1</sup> ) | Functional group – vibration mode         | Possible Assignments                            |
|--------------------------------|-------------------------------------------|-------------------------------------------------|
| 3600-3100                      | -OH stretching vibration                  | Cellulose, hemicellulose, and lignin            |
| 2919                           | C-H symmetric stretch vibration           | Cellulose, hemicellulose, and lignin            |
| 2884                           | C-H asymmetric stretching vibration       | Cellulose, lignin, and hemicellulose            |
| 1736                           | C=O stretching vibration                  | Carboxyl group in hemicellulose and lignin      |
| 1636                           | -OH bending mode                          | Moisture traces                                 |
| 1615 y 1510                    | C=C stretching vibration                  | Aromatic ring in lignin                         |
| 1425 y 1314                    | C-H bending mode                          | Alkanes in cellulose, hemicellulose, and lignin |
| 1234                           | C-O stretching vibration                  | Acetyl group in lignin                          |
| 1190-940                       | C-O-C symmetric and asymmetric stretching | Cellulose                                       |

Table S2 FTIR Signal assignment for silane treated Flx

| Wavenumber (cm <sup>-1</sup> ) | Functional group – vibration mode                 |
|--------------------------------|---------------------------------------------------|
| 1200                           | Si-O-C <sub>cellulose</sub> asymmetric stretching |
| 1370 y 965                     | Si-O-C <sub>cellulose</sub> symmetric stretching  |
| 1140                           | Si-O-Si asymmetric stretching                     |
| 700 y 1040                     | Si-O-Si symmetric stretching                      |
| 1015                           | Si-OH                                             |
| 1100-1080                      | Si-OCH <sub>3</sub> unreacted residual monomer    |
